# Supplementary material for: Hand Hygiene Evaluation Using Two Different Evaluation Tools and Hand Contamination of Veterinary Healthcare Workers in a Swiss Companion Animal Clinic
Source: MDPI journal article supplement (doi:10.3390/vetsci8110260), 2021-11-02
Supplement: s1 [file s1]

**Table S1. Indications for hand hygiene according to the WHO and examples.**  
The indications and examples have recently been published<sup>1</sup>

| <b>Indications for hand hygiene according to the WHO</b> | <b>Example</b>                                                                                                                                                                                                                         |
|----------------------------------------------------------|----------------------------------------------------------------------------------------------------------------------------------------------------------------------------------------------------------------------------------------|
| <b>After body fluid exposure risk</b>                    | After contact with urine, feces, blood, secretions, drainage, measuring of temperature                                                                                                                                                 |
| <b>After patient contact</b>                             | After clinical examination, after care of inpatients                                                                                                                                                                                   |
| <b>After patient surrounding</b>                         | After contact with the animal box, the transport box, the treatment table, the examination material, the infusion pump, ultrasound device (when being used), anesthesia device, treatment protocol, patient sheet, water/ feeding bowl |
| <b>Before clean/ aseptic/ invasive procedure</b>         | Before taking blood, setting intravenous access, punctures, changing bandages, manipulating infusion tubes, intubation, parenteral administration of medication, administration of eye drops                                           |
| <b>Before patient contact</b>                            | Before the clinical examination, before the care of inpatients                                                                                                                                                                         |

<sup>1</sup>Reference: Schmidt JS, Hartnack S, Schuller S, Kuster SP, Willi B. Hand hygiene compliance in companion animal clinics and practices in Switzerland: An observational study. Vet Rec 2021: e307.
